# Supplementary material for: Citrus depressaHayata peel ameliorates nonalcoholic fatty liver and modulates the activity of hepatic drug-metabolizing enzymes and transporters in rats fed a high-fat diet
Source: Royal Society of Chemistry journal article supplement (doi:10.1039/d1fo03597e), 2022-01-01
Supplement: d1fo03597e1.pdf [file d1fo03597e1.pdf]

### Supplementary data 1

Hepatic CYP enzyme activities in rats fed the High-fat (HF) diet for 10 weeks

|                                     | Control            | HF                 |
|-------------------------------------|--------------------|--------------------|
| CYP 1A1 (pmol/min/mg protein)       | 12.41±2.0          | 21.9±1.4*          |
| CYP 1A2 (pmol/min/mg protein)       | 18.4±3.2           | 36.3±2.6*          |
| CYP 2B (pmol/min/mg protein)        | 1.1±0.3            | 3.2±0.3*           |
| CYP 2E1 (pmol/min/mg protein)       | 88.1±8.9           | 120.6±8.9*         |
| CYP 2C (pmol/min/mg protein)        | 97.7±24.97         | 154.8±17.1*        |
| <b>CYP 3A (pmol/min/mg protein)</b> | <b>483.6±102.2</b> | <b>306.6±41.2*</b> |

Values are the mean ± SD, n = 8. \*Significantly different from the control group at  $p < 0.05$ . The approximate 40 % of daily total calories was from dietary fat (Lard).

In this pilot study, we also found that activity of some hepatic CYP enzymes, including CYP1A1, 1A2, 2B, 2C, and CYP2E1, were up-regulated, but hepatic CYP3A activity was lowered at the early stage of simple hepatic steatosis in rats fed the HF diet for 10 weeks.
