# Supplementary material for: Citrus depressaHayata peel ameliorates nonalcoholic fatty liver and modulates the activity of hepatic drug-metabolizing enzymes and transporters in rats fed a high-fat diet
Source: Royal Society of Chemistry journal article supplement (doi:10.1039/d1fo03597e), 2022-01-01
Supplement: d1fo03597e2.pdf [file d1fo03597e2.pdf]

### Supplementary data 2

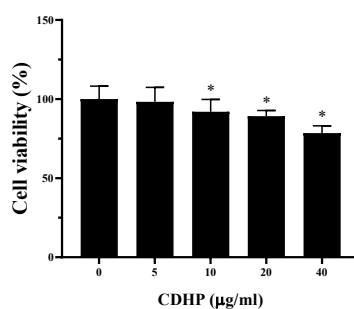

(a)

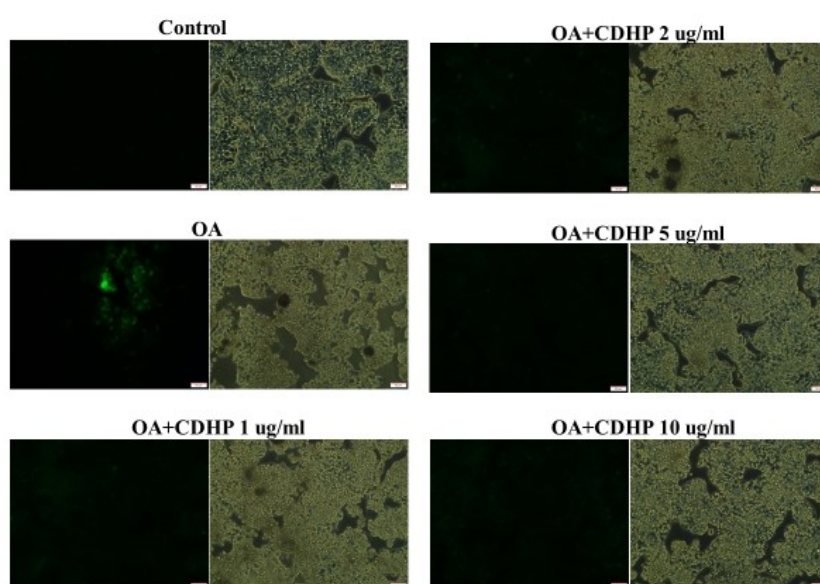

(b)

In the preliminary study, in the presence of the ethanolic extract of CDHP up to 5 µg/ml, the cell viability was not affected. The minimum concentration of ethanolic extract of CDHP that could almost suppress ROS production in oleic acid-induced steatosis in HepG2 cells was 1 µg/ml.
